# Supplementary material for: Severity and mortality of COVID-19 among people with disabilities: protocol for a systematic review and meta-analysis
Source: HighWire-hosted journal article supplement (doi:10.1136/bmjopen-2022-061438), 2022-06-01
Supplement: bmjopen-2022-061438supp001_data_supplement.pdf [file bmjopen-2022-061438supp001_data_supplement.pdf]

**Supplementary file 1:** Search string for HINARI, ScienceDirect, PEDro, Cochrane Library, MedRxiv and Google Scholar databases

| Search number | Search term                                                                                                                                                                                                                                                                                                                                                                                                                                                                                                                                                                                                                                                                                                                                                       |
|---------------|-------------------------------------------------------------------------------------------------------------------------------------------------------------------------------------------------------------------------------------------------------------------------------------------------------------------------------------------------------------------------------------------------------------------------------------------------------------------------------------------------------------------------------------------------------------------------------------------------------------------------------------------------------------------------------------------------------------------------------------------------------------------|
| #1            | COVID-19 OR Coronavirus disease 2019 OR SARS CoV-2                                                                                                                                                                                                                                                                                                                                                                                                                                                                                                                                                                                                                                                                                                                |
| #2            | disabled persons OR Handicapped OR people with disabilities OR persons with disability OR physically handicapped OR physically disabled OR physically challenged OR amputees OR mentally ill persons OR persons with mental disabilities OR psychosocial disability OR intellectual disability OR developmental disability OR autism OR autism spectrum disorder OR down syndrome OR fragile x syndrome OR sensory disability OR visual impairment OR hearing impairments OR physical disability OR cerebral palsy OR multiple sclerosis OR absence of limb OR deformities of limbs OR mental disability OR neurologic disability OR schizophrenia OR obsessive-compulsive disorder OR bipolar disorder OR Alzheimer's disease OR Parkinson's disease OR epilepsy |
| #3            | #1 AND #2                                                                                                                                                                                                                                                                                                                                                                                                                                                                                                                                                                                                                                                                                                                                                         |
| #4            | prevalence OR rate of infection OR mortality OR death OR severity OR case fatality OR hospitalization OR ICU admission OR mechanical ventilation OR effect OR impact OR long-term impact OR complication OR sequela                                                                                                                                                                                                                                                                                                                                                                                                                                                                                                                                               |
| #5            | #3 AND #4                                                                                                                                                                                                                                                                                                                                                                                                                                                                                                                                                                                                                                                                                                                                                         |
| #6            | Limit to December, 2019 to date                                                                                                                                                                                                                                                                                                                                                                                                                                                                                                                                                                                                                                                                                                                                   |
| #7            | Limit to Humans                                                                                                                                                                                                                                                                                                                                                                                                                                                                                                                                                                                                                                                                                                                                                   |
| #8            | Limit to observational studies                                                                                                                                                                                                                                                                                                                                                                                                                                                                                                                                                                                                                                                                                                                                    |
| #9            | Limit to cohort OR case-control OR cross-sectional studies                                                                                                                                                                                                                                                                                                                                                                                                                                                                                                                                                                                                                                                                                                        |
| #10           | #5 AND #6 OR #7 OR #8 OR #9                                                                                                                                                                                                                                                                                                                                                                                                                                                                                                                                                                                                                                                                                                                                       |
